# Supplementary material
Source: Springer Nature journal article supplement (https://www.springermedizin.de/resource/supplementary/12904_2010_108_MOESM1_ESM.pdf/9517520)

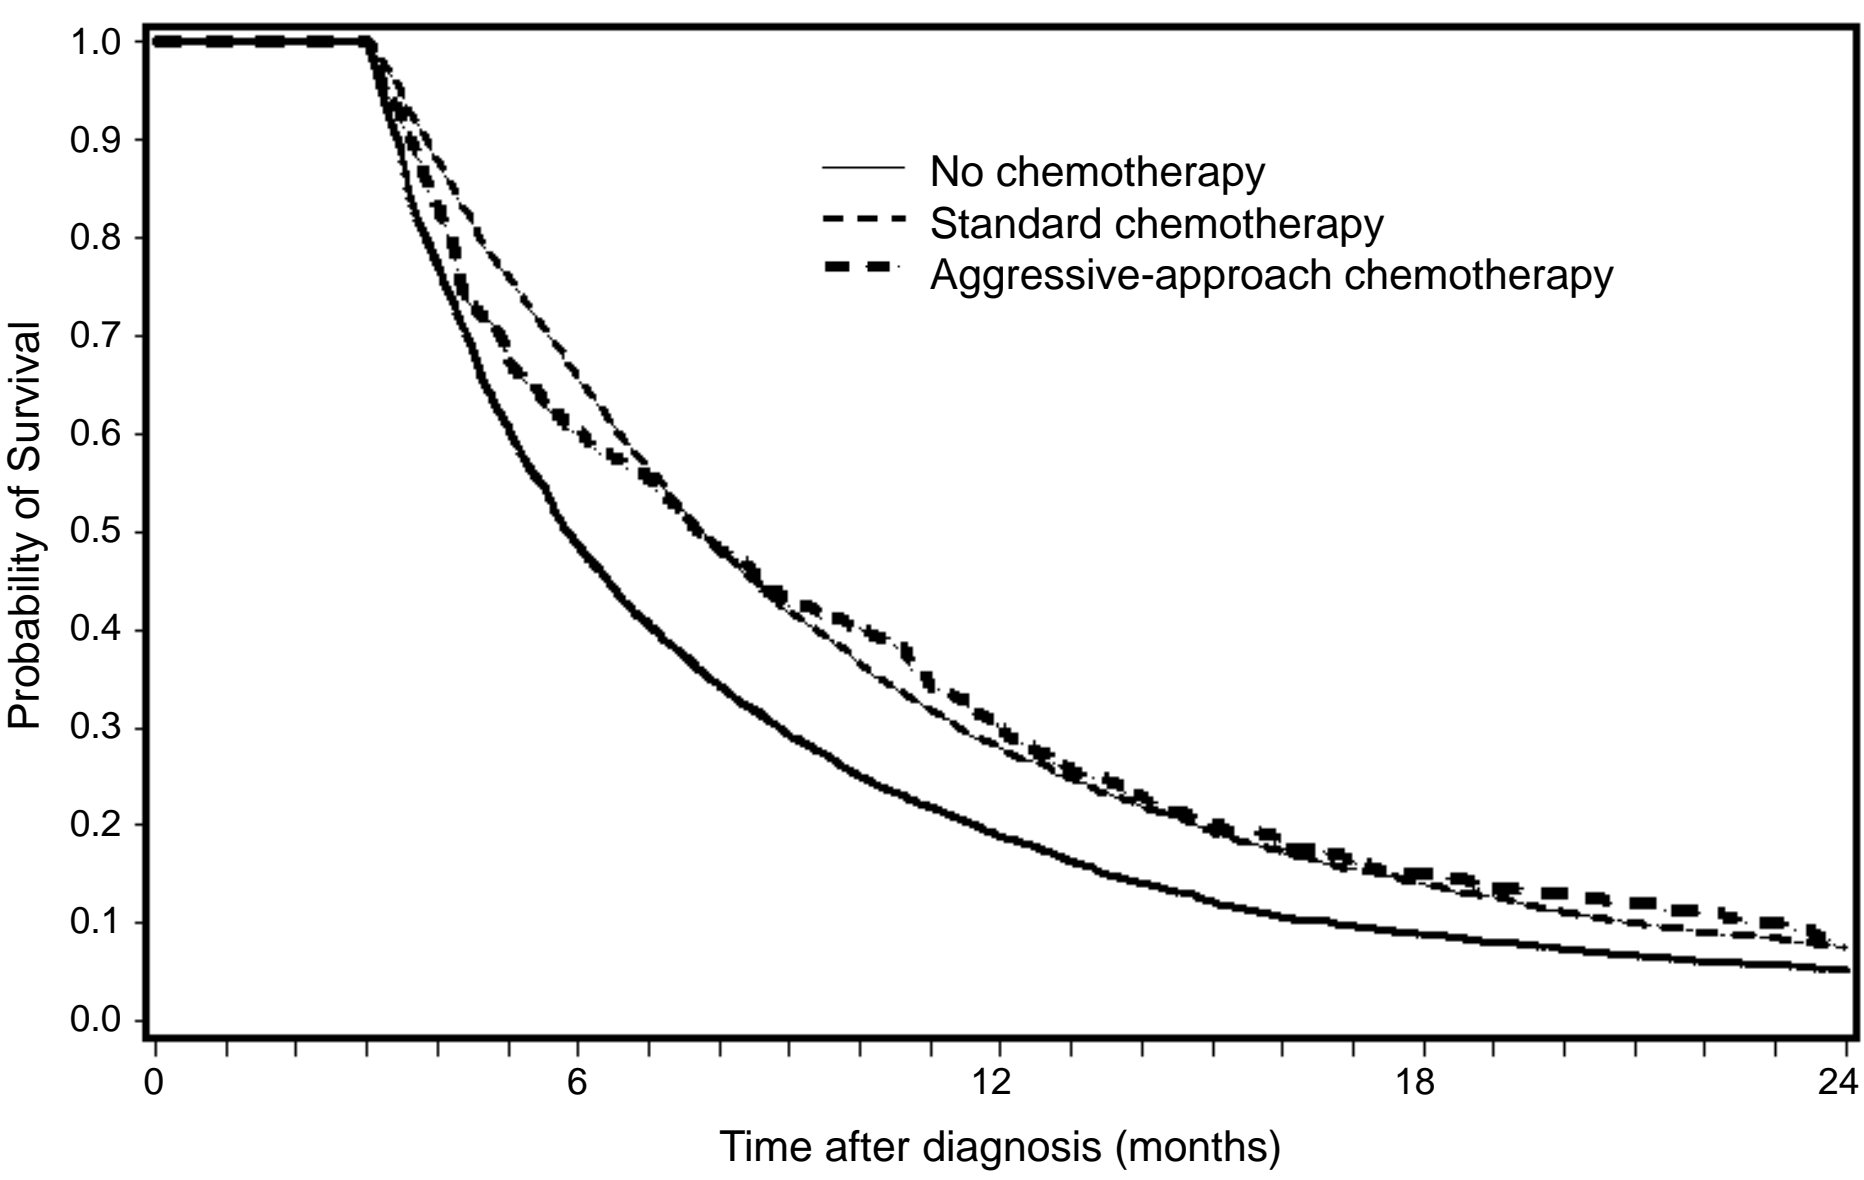

Supplement: MOESM1 [file 9517520]
